# Supplementary material for: Improving the catalytic ability of a peptide-based artificial glycosidase through a tyrosine strategy
Source: Royal Society of Chemistry journal article supplement (doi:10.1039/d3tb00693j), 2023-01-01
Supplement: d3tb00693j1.pdf [file d3tb00693j1.pdf]

## Electronic Supplementary Information (ESI)

### **Improving the catalytic ability of peptide-based artificial glycosidase through tyrosine strategy**

Lijun Yang <sup>a</sup>, Yi Tian <sup>a</sup>, Yutong Wang <sup>a</sup>, Wei Qi <sup>\*, a,c,d</sup> and Mengfan Wang <sup>\*,a,b,d</sup>

- a. School of Chemical Engineering and Technology, State Key Laboratory of Chemical Engineering, Tianjin University, Tianjin 300350, P. R. China.
- b. School of Life Sciences, Tianjin University, Tianjin 300072, P. R. China.
- c. The Co-Innovation Centre of Chemistry and Chemical Engineering of Tianjin, Tianjin 300072, P. R. China.
- d. Tianjin Key Laboratory of Membrane Science and Desalination Technology, Tianjin 300350, P. R. China.

\* Corresponding author: [mwang@tju.edu.cn](mailto:mwang@tju.edu.cn), [qiwei@tju.edu.cn](mailto:qiwei@tju.edu.cn)

**Table S1** Peptides for the construction of glycosidase-like catalysts

| Peptide assemblies               | Peptide sequence               |
|----------------------------------|--------------------------------|
| A <sub>4</sub> -E <sub>3</sub>   | Fmoc-AAAAEEE-CONH <sub>2</sub> |
| YA <sub>3</sub> -E <sub>3</sub>  | Fmoc-YAAAE-CONH <sub>2</sub>   |
| A <sub>3</sub> Y-E <sub>3</sub>  | Fmoc-AAAYEEE-CONH <sub>2</sub> |
| YA <sub>2</sub> Y-E <sub>3</sub> | Fmoc-YAAYEEE-CONH <sub>2</sub> |

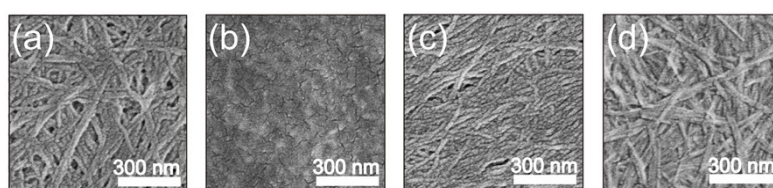

**Fig. S1** SEM images of (a) A<sub>4</sub>-E<sub>3</sub>, (b) YA<sub>3</sub>-E<sub>3</sub>, (c) A<sub>3</sub>Y-E<sub>3</sub> and (d) YA<sub>2</sub>Y-E<sub>3</sub>.

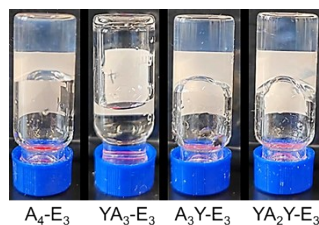

**Fig. S2** Photographic images of peptide assemblies

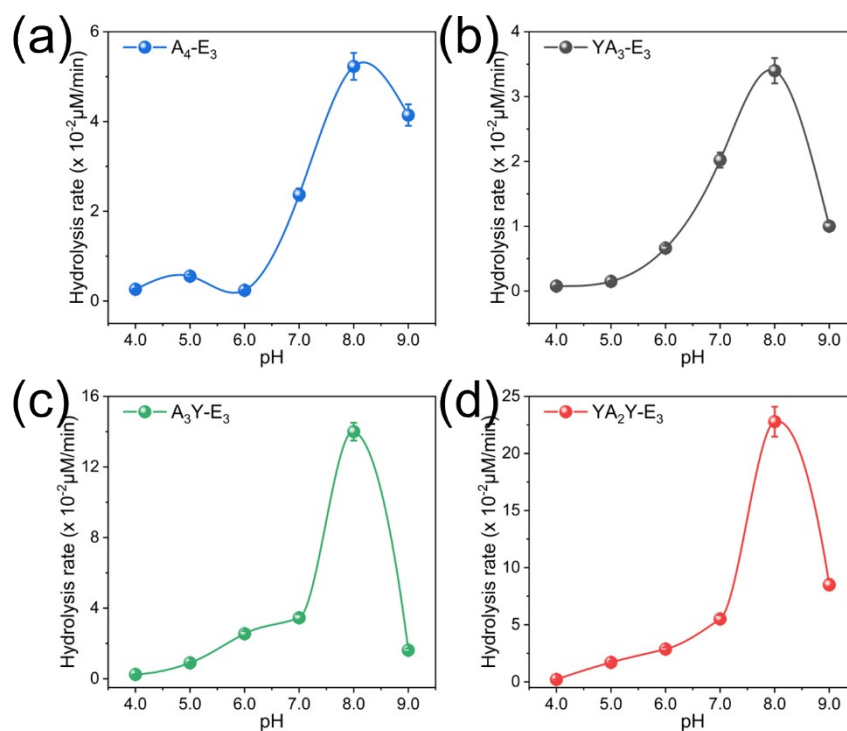

**Fig. S3** pH-*V* profiles for the hydrolysis of *p*-NPG catalyzed by peptide assemblies, (a)

A<sub>4</sub>-E<sub>3</sub>, (b) YA<sub>3</sub>-E<sub>3</sub>, (c) A<sub>3</sub>Y-E<sub>3</sub> and (d) YA<sub>2</sub>Y-E<sub>3</sub>.

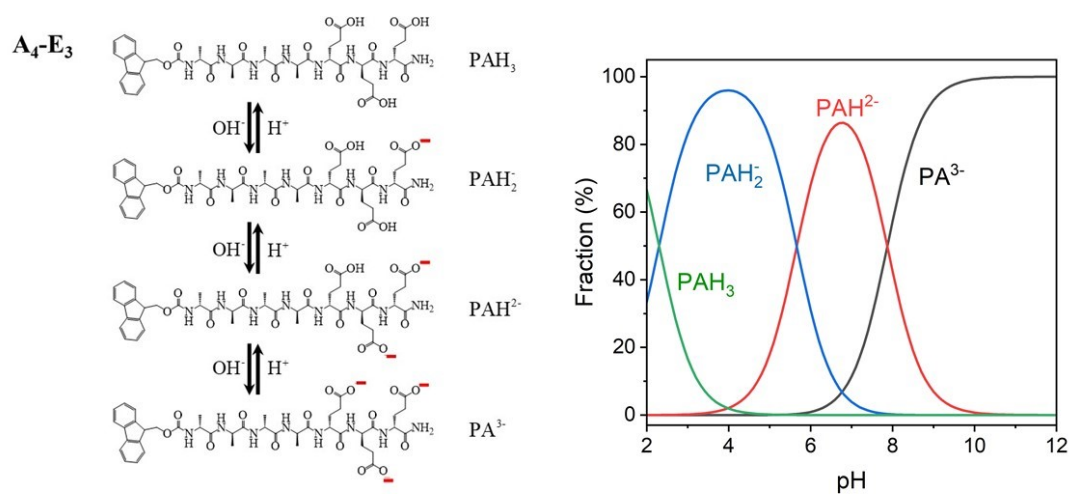

**Fig. S4** Relative abundance of different protonated and deprotonated species of A<sub>4</sub>-E<sub>3</sub>.

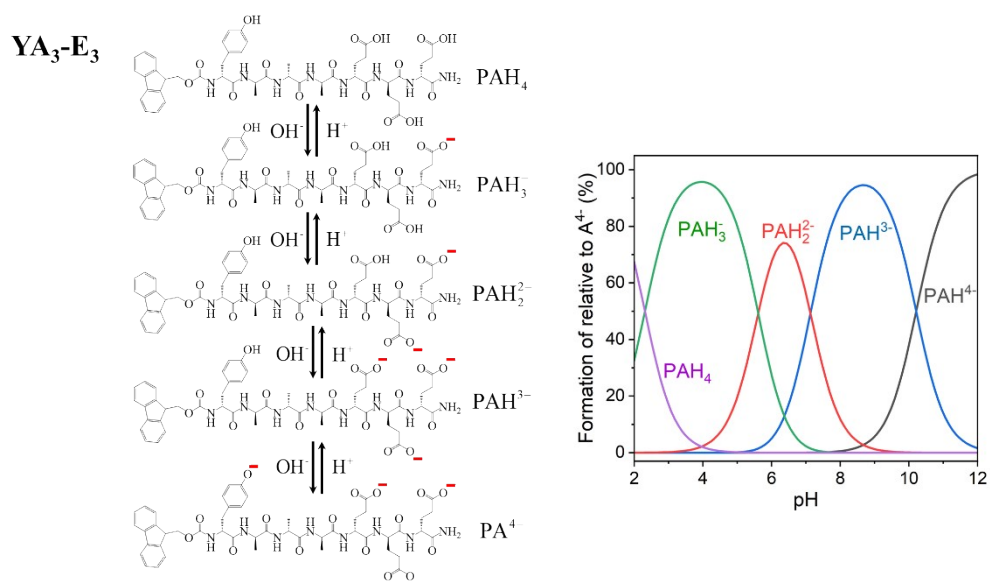

**Fig. S5** Relative abundance of different protonated and deprotonated species of YA<sub>3</sub>-E<sub>3</sub>.

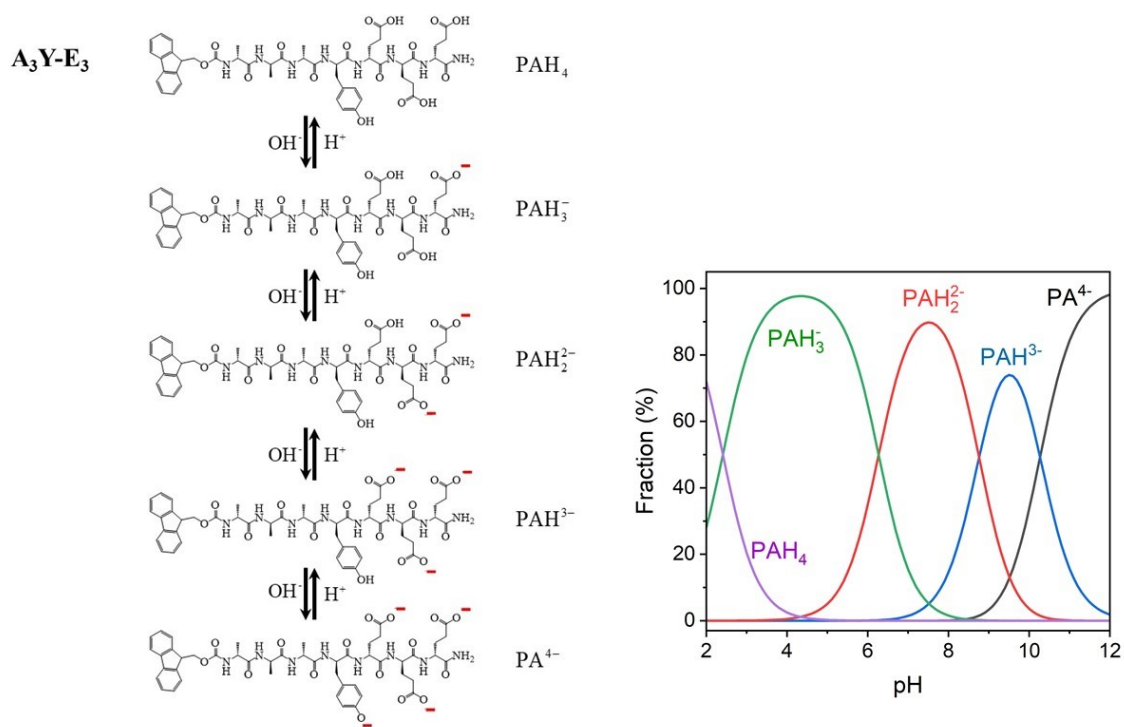

**Fig. S6** Relative abundance of different protonated and deprotonated species of A<sub>3</sub>Y-E<sub>3</sub>.

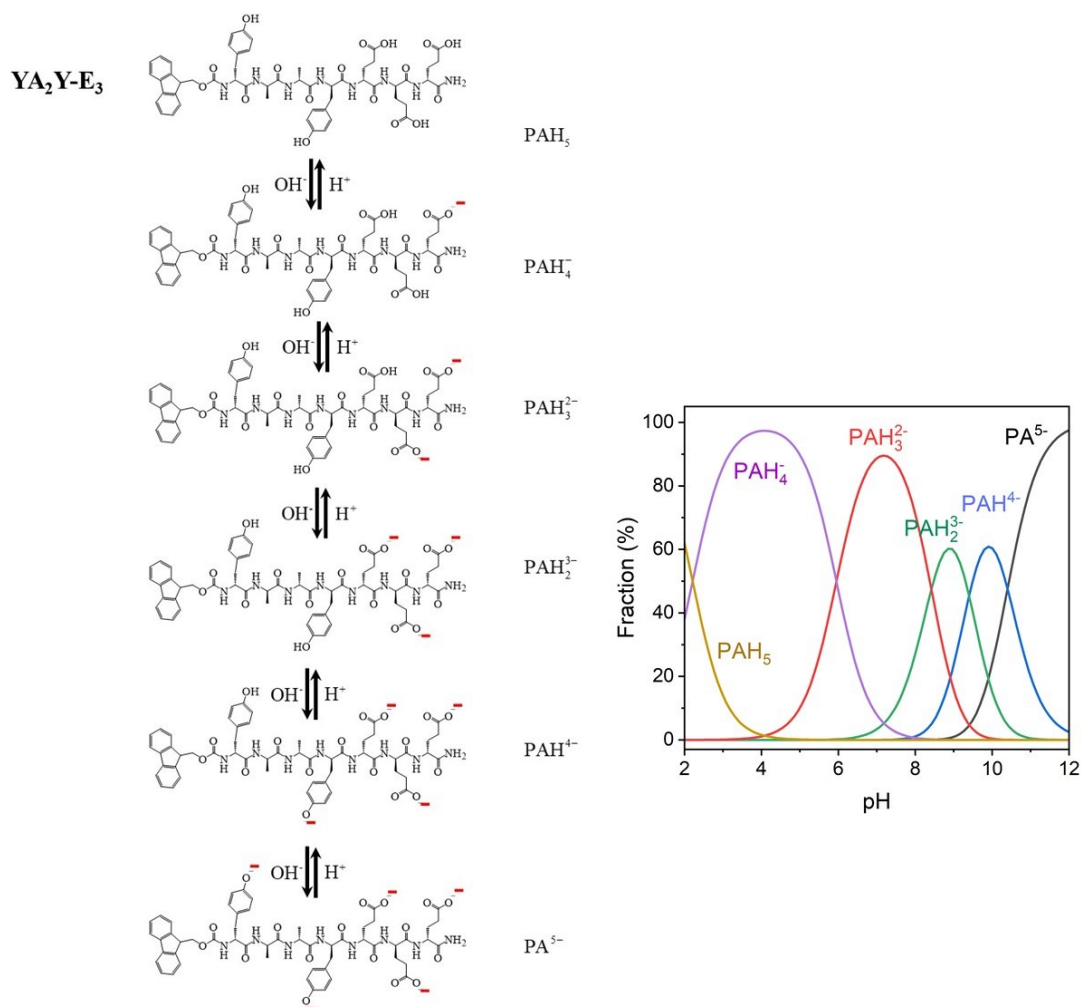

**Fig. S7** Relative abundance of different protonated and deprotonated species of YA<sub>2</sub>Y-E<sub>3</sub>.

**Table S2** The protonation state of peptide catalysts under pH 8<sup>a</sup>

|                                      |                  |                               |                                |                                |                   |                  |
|--------------------------------------|------------------|-------------------------------|--------------------------------|--------------------------------|-------------------|------------------|
| <b>A<sub>4</sub>-E<sub>3</sub></b>   | PAH <sub>3</sub> | PAH <sub>2</sub> <sup>-</sup> | PAH <sup>2-</sup>              | PA <sup>3-</sup>               |                   |                  |
| Fraction (%)                         | 0                | 0.19                          | 42.49                          | 57.32                          |                   |                  |
| <b>YA<sub>3</sub>-E<sub>3</sub></b>  | PAH <sub>4</sub> | PAH <sub>3</sub> <sup>-</sup> | PAH <sub>2</sub> <sup>2-</sup> | PAH <sup>3-</sup>              | PA <sup>4-</sup>  |                  |
| Fraction (%)                         | 0                | 0.046                         | 11.58                          | 87.82                          | 0.55              |                  |
| <b>A<sub>3</sub>Y-E<sub>3</sub></b>  | PAH <sub>4</sub> | PAH <sub>3</sub> <sup>-</sup> | PAH <sub>2</sub> <sup>2-</sup> | PAH <sup>3-</sup>              | PA <sup>4-</sup>  |                  |
| Fraction (%)                         | 0                | 1.56                          | 83.8                           | 14.56                          | 0.08              |                  |
| <b>YA<sub>2</sub>Y-E<sub>3</sub></b> | PAH <sub>5</sub> | PAH <sub>4</sub> <sup>-</sup> | PAH <sub>3</sub> <sup>2-</sup> | PAH <sub>2</sub> <sup>3-</sup> | PAH <sup>4-</sup> | PA <sup>5-</sup> |

|              |   |      |       |       |      |   |
|--------------|---|------|-------|-------|------|---|
|              |   |      |       |       |      |   |
| Fraction (%) | 0 | 0.62 | 70.74 | 27.52 | 1.12 | 0 |

<sup>a</sup> The gray shadow indicates catalytically active states

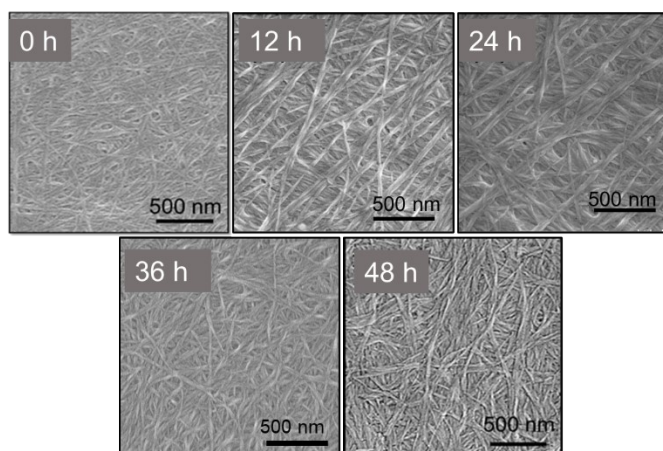

**Fig. S8** SEM images of CL-YA<sub>2</sub>Y-E<sub>3</sub> at different cross-linking time.

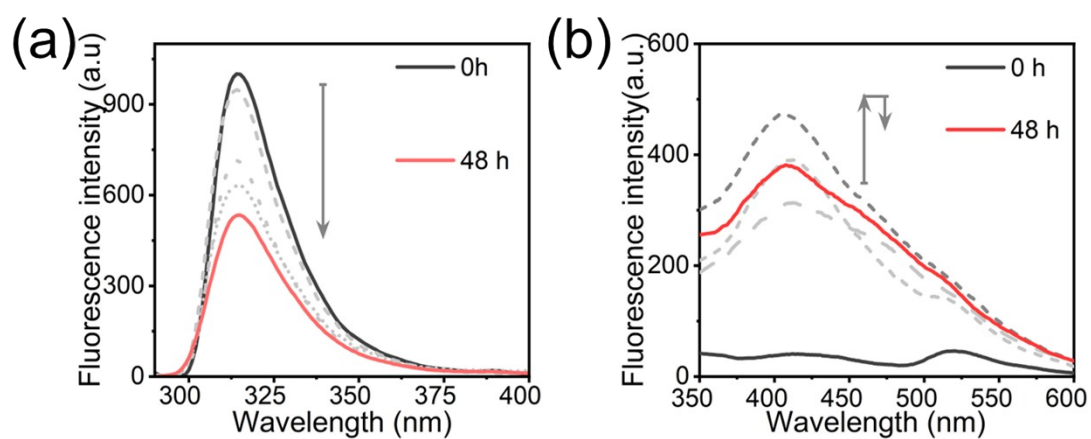

**Fig. S9** (a) Fluorescence emission spectrum of the YA<sub>2</sub>Y-E<sub>3</sub> solution (1 mM/mL) under 274 nm excitation. (b) Fluorescence emission spectrum of the YA<sub>2</sub>Y-E<sub>3</sub> solution (1 mM/mL) under 320 nm excitation.

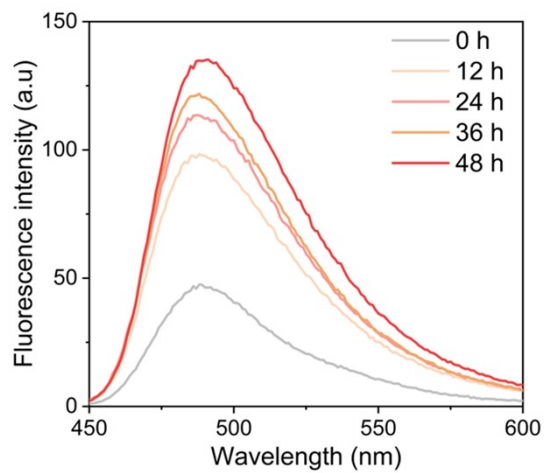

**Fig. S10** Th-T fluorescence spectrum of the CL-YA<sub>2</sub>Y-E<sub>3</sub> at different cross-linking time.

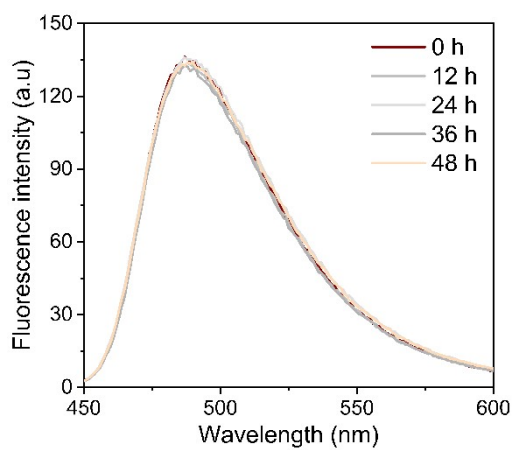

**Fig. S11** Th-T fluorescence spectrum of the CL-A<sub>4</sub>-E<sub>3</sub> at different cross-linking time.

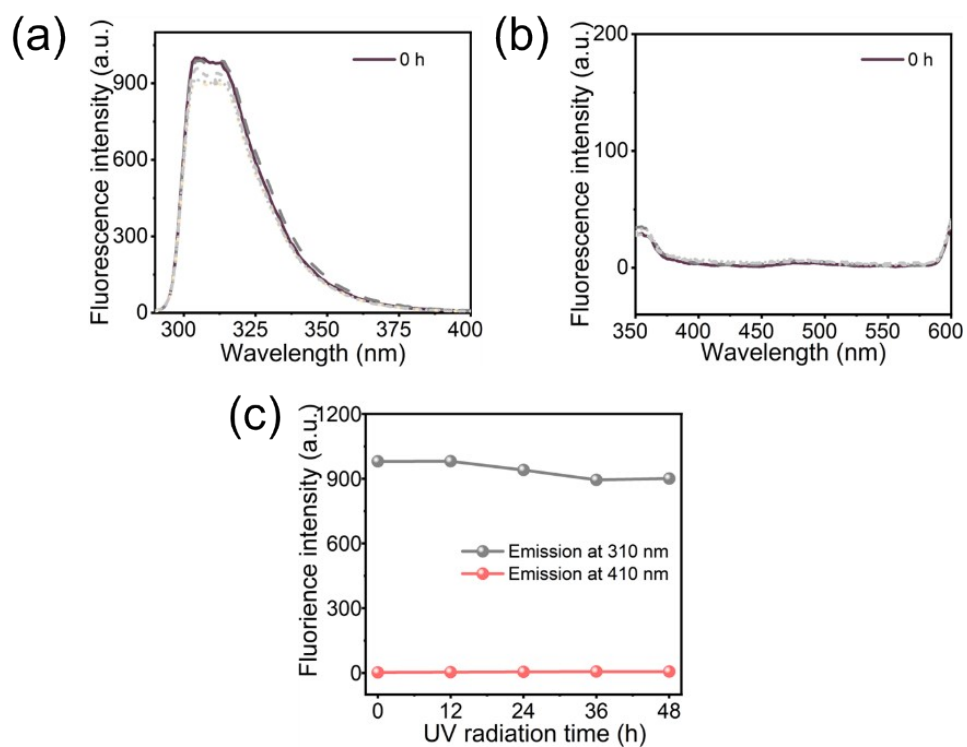

**Fig. S12** (a) Fluorescence emission spectrum of the  $A_4-E_3$  solution (1 mM/mL) under 274 nm excitation. (b) Fluorescence emission spectrum of the  $A_4-E_3$  solution (1 mM/mL) under 320 nm excitation. (c) Fluorescence intensity of emission at 274 nm and 320 nm varies with time.

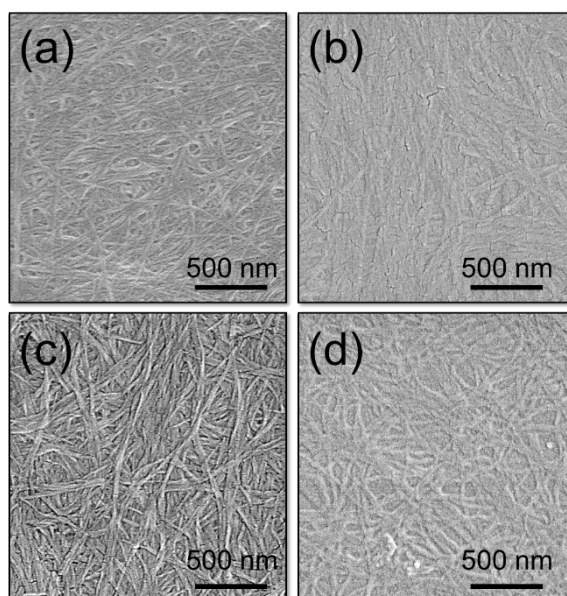

**Fig. S13** SEM images of  $YA_2Y-E_3$  before (a) and after (b) the p-NPG hydrolysis reactions. SEM images of  $CL-YA_2Y-E_3$  before (c) and after (d) the p-NPG hydrolysis reactions.



**Table S3** Comparison of YA<sub>2</sub>Y-E<sub>3</sub>, CL-YA<sub>2</sub>Y-E<sub>3</sub> with some reported glycosidase mimics in *p*-NPG (**1**) and 4-nitrophenyl  $\alpha$ -D-glucoside hydrolysis (**2**).

| Catalyst                                                                       | Temperature | Substrate | $K_m$<br>(mM) | $V_{max}$<br>( $\mu$ M/min) | $k_{cat}$<br>( $\times 10^{-3} s^{-1}$ ) | $k_{cat}/K_m$<br>( $M^{-1} min^{-1}$ ) | Substrate | Reaction time | Specific activity<br>( $\mu$ mol/h/mg) | Reference |
|--------------------------------------------------------------------------------|-------------|-----------|---------------|-----------------------------|------------------------------------------|----------------------------------------|-----------|---------------|----------------------------------------|-----------|
| YA <sub>2</sub> Y-E <sub>3</sub>                                               | 30 °C       | <b>1</b>  | 1.64          | 0.29                        | 0.0032                                   | 0.117                                  | <b>2</b>  | 96 h          | 66.2                                   | This work |
| CL-YA <sub>2</sub> Y-E <sub>3</sub>                                            |             |           | 2.59          | 0.657                       | 0.0073                                   | 0.168                                  |           |               | 123.4                                  |           |
| 6 <sup>A</sup> -( <i>R</i> )-cyanohydrin<br>CD ( <b>19</b> )                   | 59 °C       | <b>1</b>  | 5.36          |                             | 0.0012                                   | 0.013                                  | <b>2</b>  | 48 h          | 32.28                                  | 1         |
| 6 <sup>A</sup> ,6 <sup>D</sup> -dicarboxylic<br>acid $\beta$ -CD ( <b>29</b> ) | 59 °C       |           | n.d.          |                             | 0.0170                                   |                                        |           |               | 45.0                                   |           |
| Catalyst 1                                                                     | 59 °C       | <b>1</b>  | 13.40         |                             | 0.000334                                 | 0.0015                                 | <b>2</b>  | 48 h          | 8.28                                   | 2         |
| Binuclear<br>Copper(II)<br>Complexes 12                                        | 30 °C       | <b>1</b>  | 213           |                             | 0.07                                     | 0.00204                                | <b>2</b>  | 48 h          | 96.70                                  | 3         |
| Cyclodextrins 13                                                               | 30 °C       | <b>1</b>  | 80.30         |                             | 0.0142                                   | 0.0106                                 | <b>2</b>  | 48 h          | 38.62                                  | 4         |
| Dicyanohydrin- $\beta$ -<br>cyclodextrin (1)                                   | 59 °C       | <b>1</b>  | 4.14          |                             | 0.0103                                   | 0.149                                  |           |               |                                        | 5         |
| Dicyanohydrin- $\alpha$ -<br>cyclodextrin (2)                                  |             |           | 6.34          | 0.33                        | 0.0093                                   | 0.0880                                 |           |               |                                        |           |
| Cyclodextrin<br>Derivatives (11)                                               | 59 °C       | <b>1</b>  | 7.60          |                             | 0.0014                                   | 0.0111                                 |           |               |                                        | 6         |
| Compound 2                                                                     | 59 °C       | <b>1</b>  | 2.90          |                             | 0.0012                                   | 0.0123                                 | <b>2</b>  | 48 h          | 3.83                                   | 7         |

## Reference

1. J. Bjerre and M. Bols, *European Journal of Organic Chemistry*, 2010, **2010**, 3487-3500.
2. C. Rousseau, N. Nielsen and M. Bols, *Tetrahedron Letters*, 2004, **45**, 8709-8711.
3. S. Striegler, N. A. Dunaway, M. G. Gichinga, J. D. Barnett and A.-G. D. Nelson, *Inorganic Chemistry*, 2010, **49**, 2639-2648.
4. Y. Zhou, C. M. Pedersen and M. Bols, *Tetrahedron Letters*, 2013, **54**, 2458-2461.
5. F. Ortega-Caballero, J. Bjerre, L. S. Laustsen and M. Bols, *Journal of Organic Chemistry*, 2005, **70**, 7217-7226.
6. F. Ortega-Caballero, C. Rousseau, B. Christensen, T. E. Petersen and M. Bols, *Journal of the American Chemical Society*, 2005, **127**, 3238-3239.
7. J. Bjerre, T. H. Fenger, L. G. Marinescu and M. Bols, *European Journal of Organic Chemistry*, 2007, **2007**, 704-710.
